# Supplementary material
Source: publisher site journal article supplement (https://www.dovepress.com/article/456173)
Supplement: Supplementary file 1 [file get_supplementary_file.php]

| **Supplementary Table 1. Summary of the relationship between** R.gnavus and IBD | | | | | |
| --- | --- | --- | --- | --- | --- |
| No. | Author | Year | *R.gnavus* | Study group | Detecing method |
| 1 | Tom Prindiville | 2004 | ↑ | 16 biopsies from CD patients, 15 surgical samples, and 10 biopsies from HC | 16S rDNA |
| 2 | [Ben P Willing](https://pubmed.ncbi.nlm.nih.gov/?sort=date&term=Willing+BP&cauthor_id=20816835) | 2010 | ↑ | 40 twin pair | 16S sequencing |
| 3 | [Chin Wen Png](https://pubmed.ncbi.nlm.nih.gov/?sort=date&term=Png+CW&cauthor_id=20648002) | 2010 | ↑ | 46 IBD and 20 HC | Real-time PCR |
| 4 | Joossens | 2011 | ↑ | 68 CD, 84 unaffected relatives, 55HC | denaturing gradient gel electrophoresis (DGGE) |
| 5 | [Eliseo Papa](https://pubmed.ncbi.nlm.nih.gov/?sort=date&term=Papa+E&cauthor_id=22768065) | 2012 | ↑ | 91 IBD | 16S sequencing |
| 6 | [Shijia Hu](https://pubmed.ncbi.nlm.nih.gov/?sort=date&term=Hu+S&cauthor_id=33632307) | 2012 | ↑ | 25 CD and 25 HC | whole genome shotgun sequencing |
| 7 | [Dirk Gevers](https://pubmed.ncbi.nlm.nih.gov/?term=Gevers%20D%5bAuthor%5d) | 2015 | ↓ | 447 CD and 221 HC | 16S rRNA |
| 8 | [Susana Fuentes](https://pubmed.ncbi.nlm.nih.gov/?sort=date&term=Fuentes+S&cauthor_id=28398347) | 2017 | ↑ | 17 UC were allocated to the FMT-D group and 17 to the FMT-A group (healthy donor (FMT-D) or autologous faeces (FMT-A)) | 16S rRNA |
| 9 | [Kathleen Machiels](https://pubmed.ncbi.nlm.nih.gov/?sort=date&term=Machiels+K&cauthor_id=26423113) | 2017 | ↑ | 21 UC | quantitative real-time PCR |
| 10 | [Harry Sokol](https://pubmed.ncbi.nlm.nih.gov/?sort=date&term=Sokol+H&cauthor_id=28786749) | 2018 | ↑ | 8 IBD-CDI, 24 IBD only, 24 IBD in remission, and 24 HC | 16S sequencing |
| 11 | [Eric A. Franzosa](https://www.nature.com/articles/s41564-018-0306-4#auth-Eric_A_-Franzosa) | 2018 | ↑ | 43 IBD, 22 HC | untargeted metabolomic and shotgun metagenomic |
| 12 | [Christine Olbjørn](https://pubmed.ncbi.nlm.nih.gov/?sort=date&term=Olbj%C3%B8rn+C&cauthor_id=30774408) | 2019 | ↑ | 8 CD, 27UC, 3 unclassfied IBD, 50 non-IBD symptomatic patients, 75 HC | 16S rRNA DNA-based test using GA-Map™ technology |
| 13 | [Rongrong Ren](https://pubmed.ncbi.nlm.nih.gov/?sort=date&term=Ren+R&cauthor_id=34867859) | 2021 | ↑ | 31 active UC | 16S rRNA sequencing |
| 14 | [Wendy Li](https://pubmed.ncbi.nlm.nih.gov/?sort=date&term=Li+W&cauthor_id=33947329) | 2021 | ↑ | 28 UC, 28 HC | 16S rRNA |
| 15 | [Vadim Dubinsky](https://pubmed.ncbi.nlm.nih.gov/?sort=date&term=Dubinsky+V&cauthor_id=33653942) | 2021 | ↑(P) | 69 pouches, 76 UC, 88 CD, 56 HC | metagenomics |
| 16 | [Xin Gao](https://pubmed.ncbi.nlm.nih.gov/?sort=date&term=Gao+X&cauthor_id=35275769) | 2022 | ↑ | 37 UC, 15 healthy UC pouches, 15 pouchitis and 18 HC | 16S rDNA |
| 17 | [Seung Yong Shin](https://irjournal.org/articles/search_result.php?term=author&f_name=Seung%20Yong&l_name=Shin) | 2022 | ↑ | 70 UC, 39 CD, 100 HC | Illumina MiSeq |
| 18 | [Lijuan Feng](https://pubmed.ncbi.nlm.nih.gov/?sort=date&term=Feng+L&cauthor_id=34939244) | 2022 | ↑ | 39 CD, 14 HC | 16S rRNA |
| 19 | [Hana Čipčić Paljetak](https://pubmed.ncbi.nlm.nih.gov/?sort=date&term=%C4%8Cip%C4%8Di%C4%87+Paljetak+H&cauthor_id=35695669) | 2022 | ↑ | 13 UC, 10 CD, 26 IBS, 12HC | 16S rRNA |
| 20 | [Si Yu](https://pubmed.ncbi.nlm.nih.gov/?sort=date&term=Yu+S&cauthor_id=36814443) | 2023 | ↑ | 25 IBD-CDI, 51 IBD-only, 40 HC | Shotgun sequencing |
| 21 | [Hadba Al-Amrah](https://pubmed.ncbi.nlm.nih.gov/?sort=date&term=Al-Amrah+H&cauthor_id=36695274) | 2023 | ↓ | 11 IBD, 10 HC | 16S rRNA |
| 22 | [Anthony Buisson](https://pubmed.ncbi.nlm.nih.gov/?sort=date&term=Buisson+A&cauthor_id=35361684) | 2023 | ↑ | 181 CD | 16S sequencing |
| *R. gnavus, Ruminococcus gnavus;* IBD, inflammatory bowel diseases; CD, Crohn’s disease; UC, ulcerative colitis; HC, healthy controls; FMT, faecal microbiota transplantation; CDI, Clostridium difficile infection. | | | | | |
|

| **Supplementary Table 2. Summary of the relationship between *R.gnavus* and obesity** | | | | | |
| --- | --- | --- | --- | --- | --- |
| No. | Author | Year | *R.gnavus* | Study group | Detecing method |
| 1 | [Froukje J Verdam](https://pubmed.ncbi.nlm.nih.gov/?sort=date&term=Verdam+FJ&cauthor_id=23526699) | 2013 | ↑ | 28 subjects | 16S rRNA |
| 2 | [Zhuye Jie](https://pubmed.ncbi.nlm.nih.gov/?sort=date&term=Jie+Z&cauthor_id=33482223) | 2021 | ↑ | 83 participants | Metagenomic Shotgun Sequencin |
| 3 | [Yuanhuan Wei](https://pubmed.ncbi.nlm.nih.gov/?sort=date&term=Wei+Y&cauthor_id=33277072) | 2021 | ↓ | 236 | 6S rRNA |
| 4 | [Hang Yan](https://pubmed.ncbi.nlm.nih.gov/?sort=date&term=Yan+H&cauthor_id=35127566) | 2021 | ↑ | 41 normal body mass index (BMI) (18.5 ≤ BMI < 23.9) were included and divided into the low visceral fat area (L-VFA) group (n = 23, VFA < 100 cm2) and the high visceral fat area (H-VFA) group (n = 18, VFA ≥ 100 cm2). | Shotgun Metagenomic Sequencing |
| 5 | [Vanessa Palmas](https://pubmed.ncbi.nlm.nih.gov/?sort=date&term=Palmas+V&cauthor_id=33750881) | 2021 | ↑ | 46 obese, 46 normal-weight controls | 16S rRNA |
| 6 | Louise Grahnemo | 2022 | ↑ | 5215 | quantitative PCR |
| 7 | [Xin Yuan](https://pubmed.ncbi.nlm.nih.gov/?sort=date&term=Yuan+X&cauthor_id=36704910) | 2023 | ↑ | 89 | 16S rDNA |
| *R. gnavus, Ruminococcus gnavus.* | | | | |  |

| **Supplementary Table 3. Summary of the relationship between *R.gnavus*** and DM | | | | | |
| --- | --- | --- | --- | --- | --- |
| No. | Author | Year | *R.gnavus* | Study group | Detecing method |
| 1 | Prasanna Kulkarni | 2021 | ↑ | 5 T2DM, 5 HC | 16S rRNA |
| 2 | [Cristina Ma Díaz-Perdigones](https://pubmed.ncbi.nlm.nih.gov/?sort=date&term=D%C3%ADaz-Perdigones+CM&cauthor_id=34844104) | 2022 | ↓(tolerant) | 35 T2DM (15 early intolerant, 10 tolerant, and 10 non-tolerant ) | 16 S rRNA |
| 3 | Genxia Li | 2021 | ↑(in longer gestational week) | 23 GDM | 16S rRNA |
| 4 | [Kristine H Allin](https://pubmed.ncbi.nlm.nih.gov/?sort=date&term=Allin+KH&cauthor_id=29379988) | [2018](https://pubmed.ncbi.nlm.nih.gov/?sort=date&term=Allin+KH&cauthor_id=29379988) | ↑ | 134 prediabetes, 134 HC | 16S rRNA |
| 5 | [Matti O. Ruuskanen](https://diabetesjournals.org/care/article/45/4/811/141052/javascript:;) | 2022 | positive related | 5572 | 16S rRNA |
| 6 | [Ting Xu](https://journals.asm.org/doi/10.1128/mbio.03487-22?url_ver=Z39.88-2003&rfr_id=ori:rid:crossref.org&rfr_dat=cr_pub%20%200pubmed#con1) | 2023 | ↑ a moderate level of blood glucose, serious insulin resistance, and high levels of cholesterol and triglyceride | 132 participants had the lowest blood glucose levels, 96 participants had a moderate level of blood glucose, serious insulin resistance, and high levels of cholesterol and triglyceride, 30 participants had a high level of blood glucose and insulin deficiency | 16S rRNA |
| 7 | [Xuhuiqun Zhang](https://pubmed.ncbi.nlm.nih.gov/?sort=date&term=Zhang+X&cauthor_id=35421233) | 2022 | ↓ | 26 PreDM-IR, 10 metabolically HC | 16S rRNA |
| *R. gnavus, Ruminococcus gnavus.* |  |  |  |  |  |
